# Supplementary material
Source: PubMed Central journal article supplement (PMC4187972)

1 **Synergistic effects of antimicrobial peptides and antibiotics against *Clostridium difficile***

2 Nuding Sabine<sup>1</sup>, Frasch Tina<sup>2</sup>, Schaller Martin<sup>3</sup>, Stange Eduard F.<sup>4</sup>, Zabel Lutz T.<sup>2#</sup>

3

4 **Supplementary data**

5 **Table S1: Results Etest**

6

7 **A) Tigecycline**

|                                   | <b>Quality control range MIC</b> | <b>MIC :</b> |
|-----------------------------------|----------------------------------|--------------|
| <i>S.aureus</i> ATCC 25923        | 0.032- 0.25                      | 0.125        |
| <i>B.fragilis</i> PZ 4024         | 0.125- 0.5                       | 0.125        |
| <i>B.thetaiotaomicron</i> PZ 4045 | 0.5- 2                           | 0.5          |
| <i>C.difficile</i> DSM 1296       |                                  | <0.016       |
| <i>C.difficile</i> Isol. 003      |                                  | 0.016        |
| <i>C.difficile</i> Isol. 058      |                                  | 0.016        |
| <i>C.difficile</i> Isol. 109      |                                  | 0.016        |
| <i>C.difficile</i> Isol. 422      |                                  | 0.016        |
| <i>C.difficile</i> Isol 733       |                                  | 0.016        |
| <i>C.difficile</i> Isol. 1165     |                                  | 0.016        |
| <i>C.difficile</i> Isol. 165      |                                  | 0,016        |
| <i>C.difficile</i> Isol. 1856     |                                  | 0.016        |
| <i>C.difficile</i> Isol. 3331     |                                  | 0.016        |
| <i>C.difficile</i> Isol. 5071     |                                  | <0.016       |
| <i>C.difficile</i> Isol. 5397     |                                  | 0.016        |
| <i>C.difficile</i> Isol. 5684     |                                  | 0.016        |
| <i>C.difficile</i> Isol. 6504     |                                  | 0.016        |
| <i>C.difficile</i> Isol. 6562     |                                  | 0.016        |
| <i>C.difficile</i> Isol. 6972     |                                  | 0.016        |
| <i>C.difficile</i> Isol. 702      |                                  | <0.016       |
| <i>C.difficile</i> Isol. 7208     |                                  | 0.016        |
| <i>C.difficile</i> Isol. 801      |                                  | 0.016        |
| <i>C.difficile</i> Isol. 9810     |                                  | 0.016        |

8

9 **B) Moxifloxacin**

|                                   | <b>Quality control range MIC</b> | <b>MIC :</b> |
|-----------------------------------|----------------------------------|--------------|
| <i>B.fragilis</i> PZ 4024         | 0.125- 0.5                       | 0.125        |
| <i>B.thetaiotaomicron</i> PZ 4045 | 0.5- 2                           | 0.75         |
| <i>C.difficile</i> DSM 1296       |                                  | 0.38         |
| <i>C.difficile</i> Isol. 003      |                                  | 0.5          |
| <i>C.difficile</i> Isol. 058      |                                  | >32          |
| <i>C.difficile</i> Isol. 109      |                                  | 0.125        |
| <i>C.difficile</i> Isol. 165      |                                  | >32          |
| <i>C.difficile</i> Isol. 422      |                                  | >32          |
| <i>C.difficile</i> Isol. 733      |                                  | >32          |
| <i>C.difficile</i> Isol. 1165     |                                  | >32          |
| <i>C.difficile</i> Isol. 1856     |                                  | >32          |
| <i>C.difficile</i> Isol. 3331     |                                  | >32          |
| <i>C.difficile</i> Isol. 5071     |                                  | 0.75         |
| <i>C.difficile</i> Isol. 5397     |                                  | >32          |
| <i>C.difficile</i> Isol. 5684     |                                  | >32          |

|                                |  |      |
|--------------------------------|--|------|
| <i>C. difficile</i> Isol. 6504 |  | >32  |
| <i>C. difficile</i> Isol. 6562 |  | >32  |
| <i>C. difficile</i> Isol. 6972 |  | >32  |
| <i>C. difficile</i> Isol. 702  |  | 0.75 |
| <i>C. difficile</i> Isol. 7208 |  | >32  |
| <i>C. difficile</i> Isol. 801  |  | 0.5  |
| <i>C. difficile</i> Isol. 9810 |  | >32  |

10  
11

### C) Piperacillin/Tazobactam

|                                   | Quality control range MIC | MIC:  |
|-----------------------------------|---------------------------|-------|
| <i>B.fragilis</i> PZ 4024         | 0.064- 0.5                | 0.125 |
| <i>B.thetaiotaomicron</i> PZ 4045 |                           | 4     |
| <i>C. difficile</i> DSM 1296      |                           | 3     |
| <i>C. difficile</i> Isol. 003     |                           | 3     |
| <i>C. difficile</i> Isol. 058     |                           | 3     |
| <i>C. difficile</i> Isol. 109     |                           | 3     |
| <i>C. difficile</i> Isol. 422     |                           | >32   |
| <i>C. difficile</i> Isol. 733     |                           | 3     |
| <i>C. difficile</i> Isol. 1165    |                           | 1,5   |
| <i>C. difficile</i> Isol. 165     |                           | 6     |
| <i>C. difficile</i> Isol. 1856    |                           | 4     |
| <i>C. difficile</i> Isol. 5071    |                           | 1.5   |
| <i>C. difficile</i> Isol. 5684    |                           | 0.75  |
| <i>C. difficile</i> Isol. 6972    |                           | 4     |
| <i>C. difficile</i> Isol. 702     |                           | 0.75  |
| <i>C. difficile</i> Isol. 801     |                           | 6     |
| <i>C. difficile</i> Isol. 9810    |                           | 4     |
| <i>C. difficile</i> Isol. 6504    |                           | 6     |
| <i>C. difficile</i> Isol. 6562    |                           | 6     |
| <i>C. difficile</i> Isol. 7208    |                           | 8     |
| <i>C. difficile</i> Isol. 3331    |                           | 3     |
| <i>C. difficile</i> Isol. 5397    |                           | 3     |

12  
13

### D) Imipenem

|                                    | Quality control range MIC: | MIC : |
|------------------------------------|----------------------------|-------|
| <i>B. fragilis</i> PZ 4024         | 0.032- 0.125               | 0.032 |
| <i>B. thetaiotaomicron</i> PZ 4045 | 0.064- 0.25                | 0.064 |
| <i>C. difficile</i> DSM 1296       |                            | >32   |
| <i>C. difficile</i> Isol. 003      |                            | >32   |
| <i>C. difficile</i> Isol. 058      |                            | >32   |
| <i>C. difficile</i> Isol. 109      |                            | >32   |
| <i>C. difficile</i> Isol. 422      |                            | >32   |
| <i>C. difficile</i> Isol. 733      |                            | 2     |
| <i>C. difficile</i> Isol. 1165     |                            | >32   |
| <i>C. difficile</i> Isol. 165      |                            | 6     |
| <i>C. difficile</i> Isol. 1856     |                            | >32   |
| <i>C. difficile</i> Isol. 5071     |                            | >32   |
| <i>C. difficile</i> Isol. 5684     |                            | >32   |
| <i>C. difficile</i> Isol. 6972     |                            | >32   |
| <i>C. difficile</i> Isol. 702      |                            | >32   |
| <i>C. difficile</i> Isol. 801      |                            | >32   |
| <i>C. difficile</i> Isol. 9810     |                            | >32   |
| <i>C. difficile</i> Isol. 6504     |                            | >32   |
| <i>C. difficile</i> Isol. 6562     |                            | >32   |
| <i>C. difficile</i> Isol. 7208     |                            | >32   |

|                                |  |     |
|--------------------------------|--|-----|
| <i>C. difficile</i> Isol. 3331 |  | 12  |
| <i>C. difficile</i> Isol. 5397 |  | >32 |

15 **Figure S1:**

16 Percent of depolarized bacteria (mean + SD) of 10 toxinogenic strains (A) and 10 non  
17 toxinogenic strains (B) incubated with 1 µg/ml of the antimicrobial peptides HBD1, HBD2,  
18 HBD3, HD5, LL-37, subinhibitory concentrations of the antibiotics tigecycline, moxifloxacin,  
19 piperacillin/tazobactam and meropenem or the combination of antimicrobial peptides and  
20 antibiotics. Untreated control see first graph, first bar. For comparison of means of bacterial  
21 killing the Mann-Whitney test was used (\*\*\*\*:  $p < 0.0001$ ; \*\*\*:  $p < 0.0005$ ; \*\*:  $p < 0.005$ ; \*:  $p <$   
22  $0.05$ ).

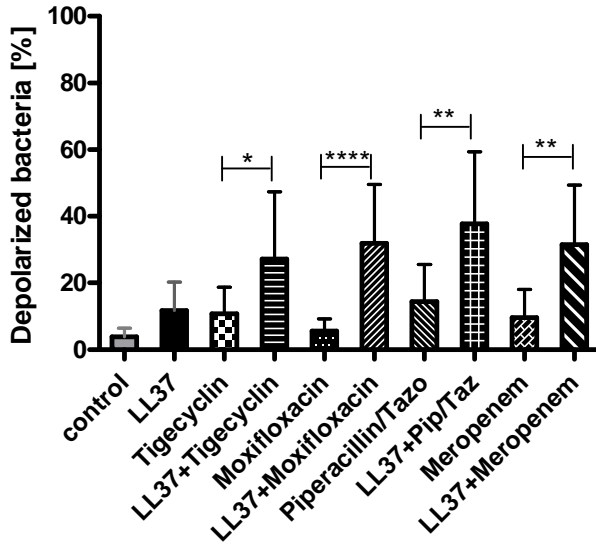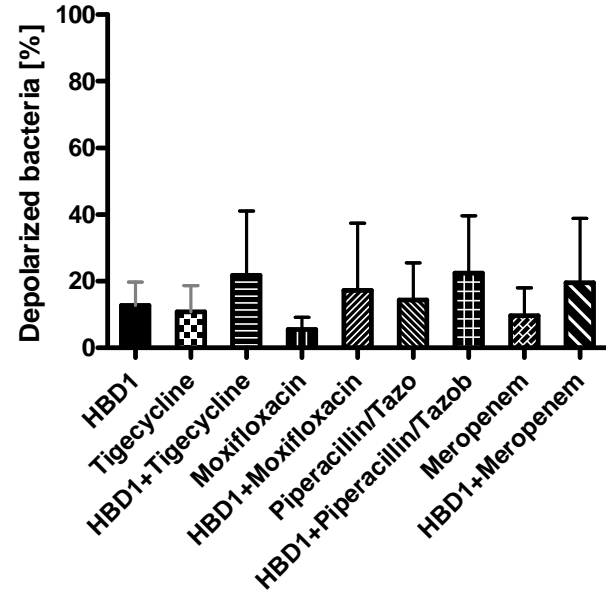

24

25

26

27

28

29

30

31

32

33

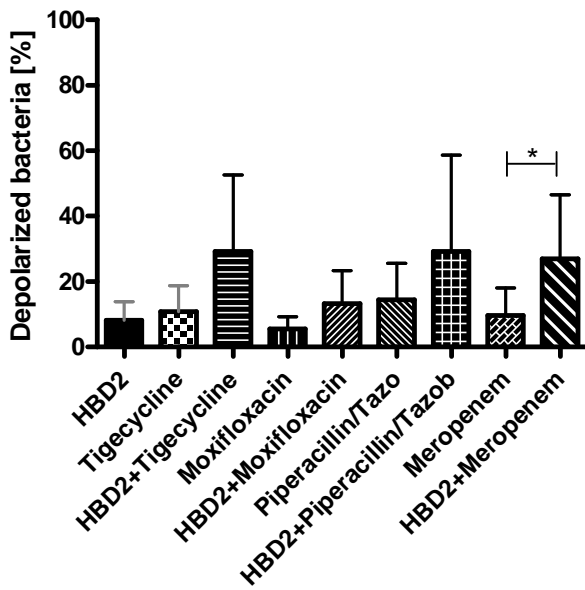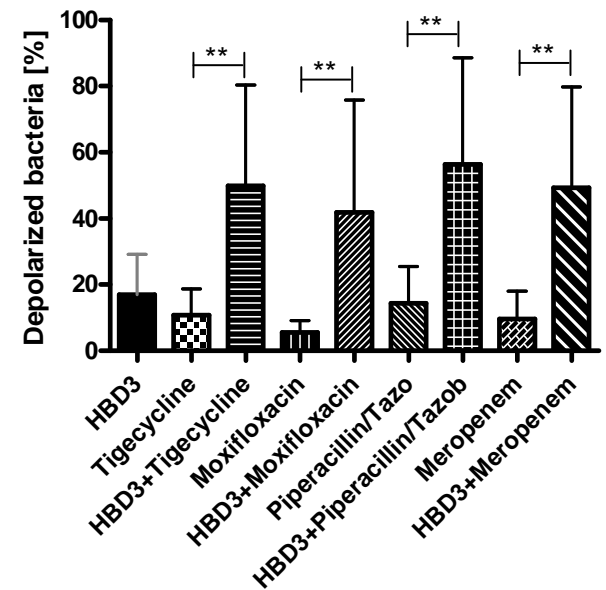

34

35

36

37

38

39

40

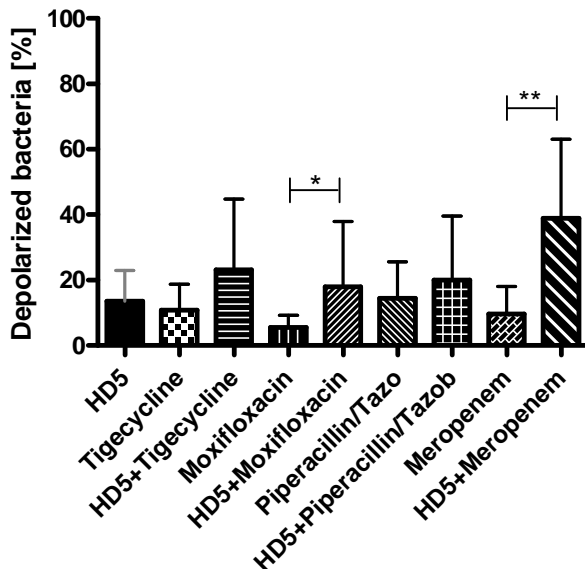

41 B)

42

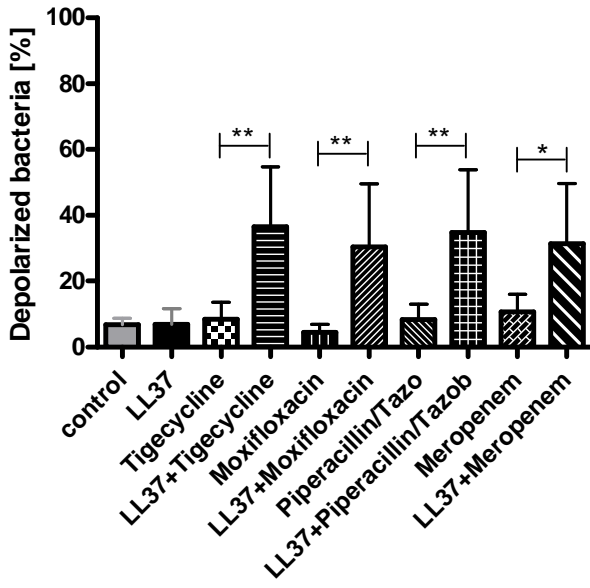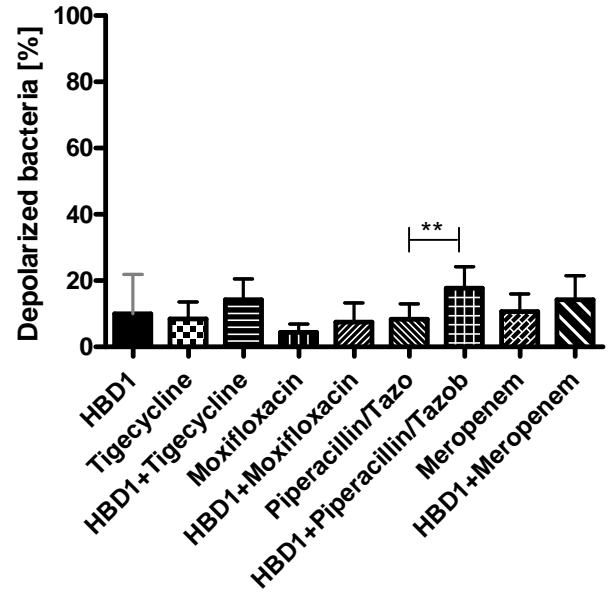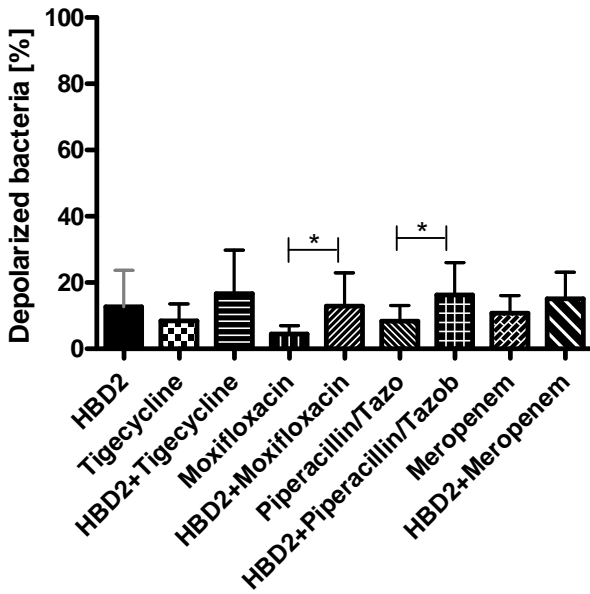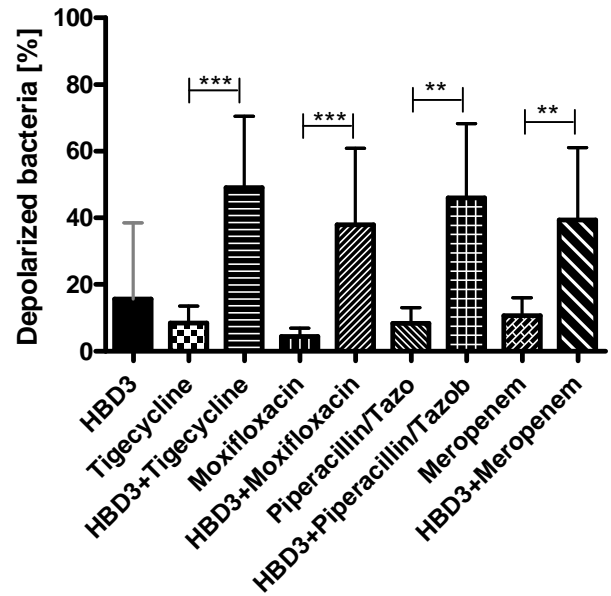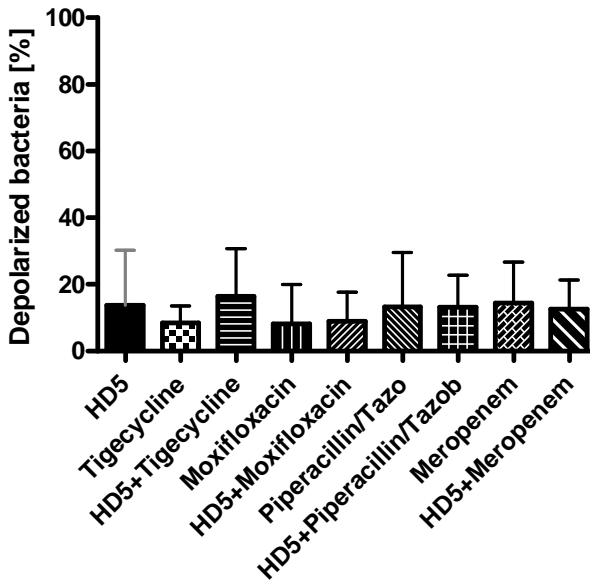

Supplement: AAC.02542-14_zac009143260so1.pdf [file AAC.02542-14_zac009143260so1.pdf]
